# Supplementary material for: Phage Targeting Neonatal Meningitis E. coli K1 In Vitro in the Intestinal Microbiota of Pregnant Donors and Impact on Bacterial Populations
Source: MDPI journal article supplement (doi:10.3390/ijms241310580), 2023-06-24
Supplement: s1 [file s1]

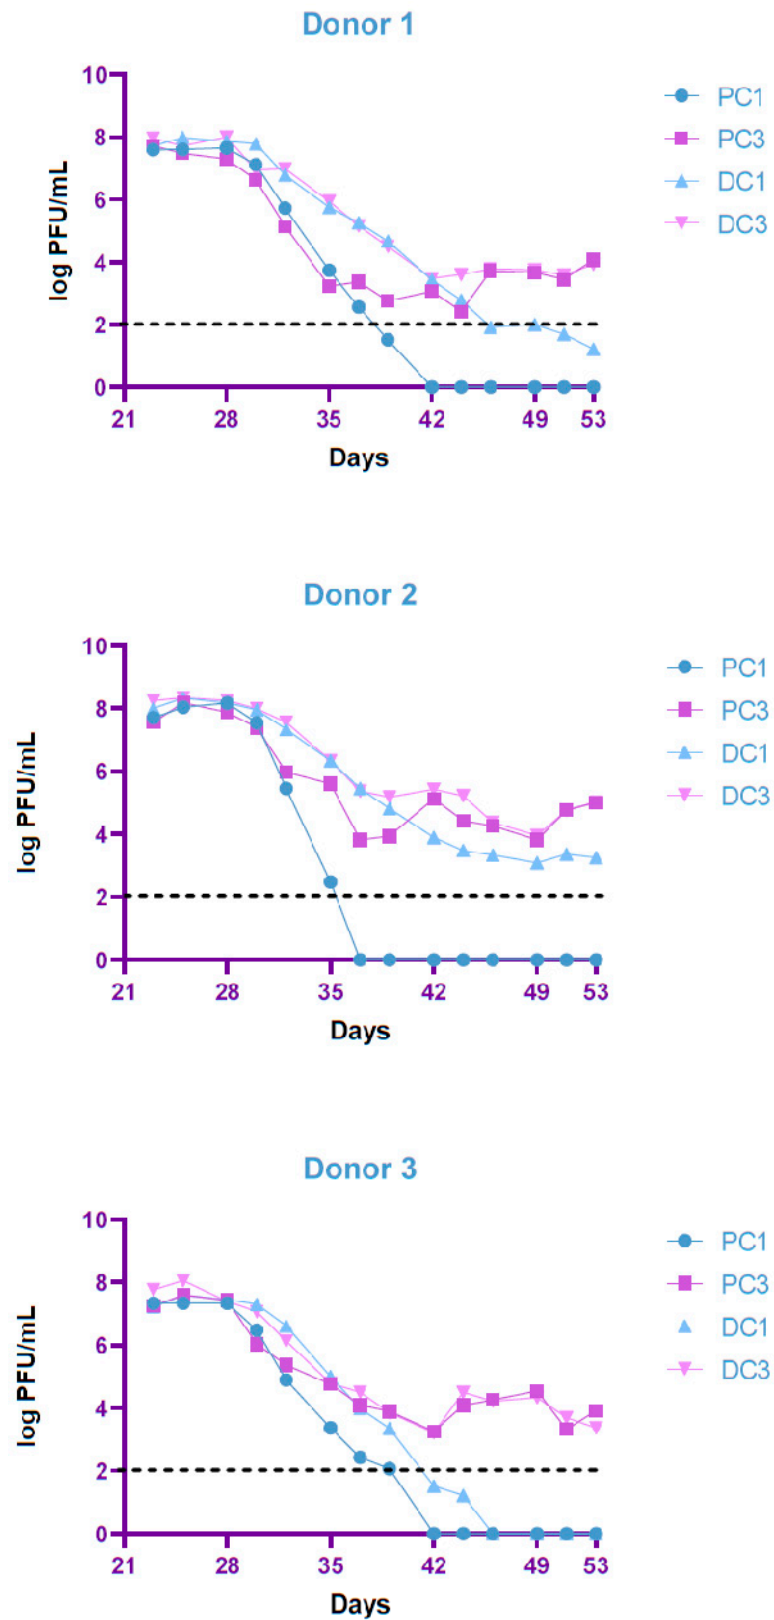

Figure S1: Individual values of phage K1\_ULINTec4 concentrations measured. PC: proximal colon, DC: distal colon, 1: system 1 (phage alone), 3: system 3 (bacteria+phage). The dotted line represents the limit of quantification.

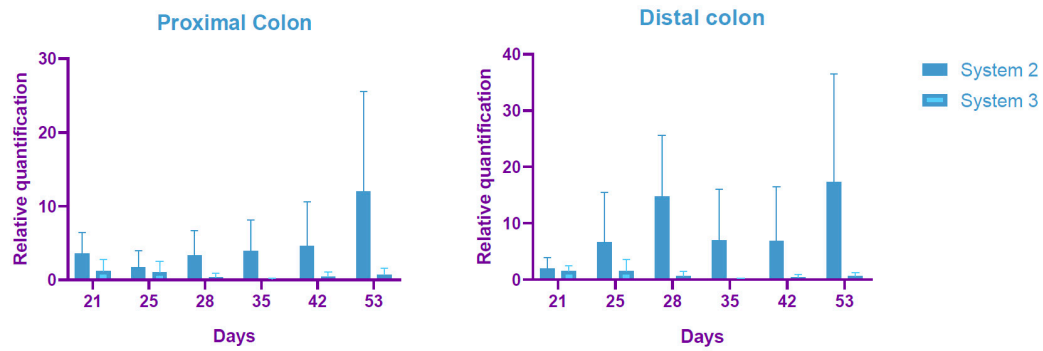

Figure S2: Comparisons of relative quantifications of *E. coli* K1 between systems 2 and 3. Data presented were calculated using  $2^{-\Delta\Delta Cq}$  method. PC: proximal colon, DC: distal colon. The replicates represent the mean results of the three separate donors with SD. No statistically significant difference was highlighted.

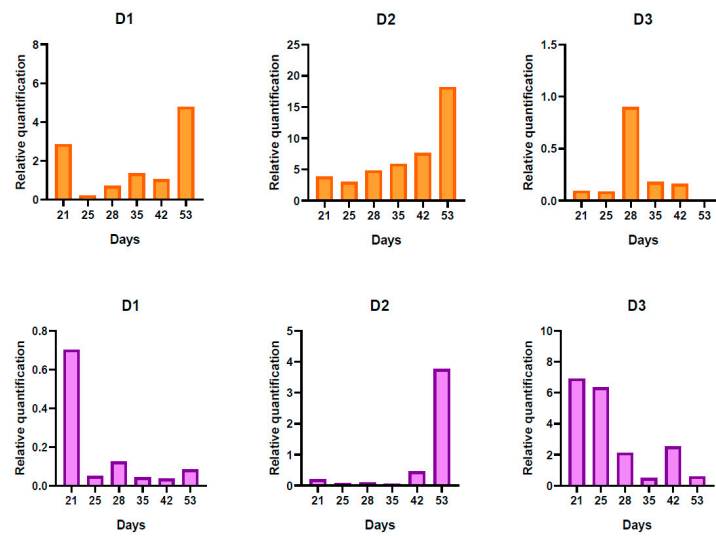

Figure S3: Individual values of relative quantifications of *E. coli* K1 in proximal colons. Orange: system 2, Purple: system 3. Data presented were calculated using  $2^{-\Delta\Delta Cq}$  method. D1: donor 1, D2: donor 2, D3: donor 3

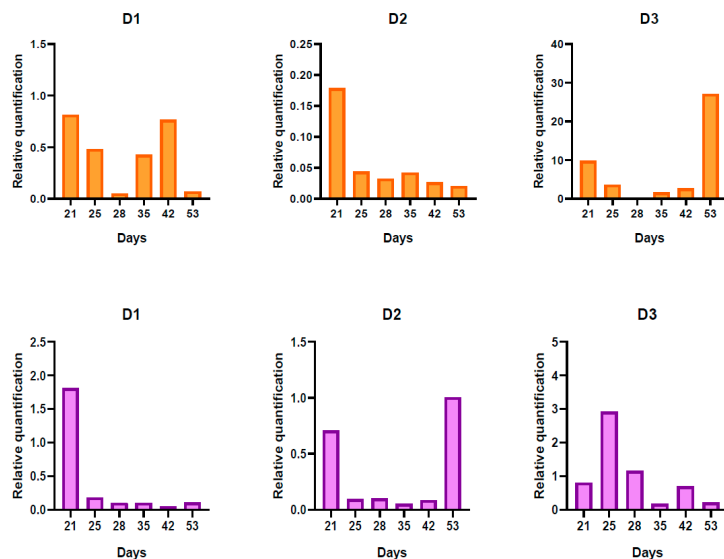

Figure S4: Individual values of relative quantifications of *E. coli* K1 in distal colons. Orange: system 2, Purple: system 3. Data presented were calculated using  $2^{-\Delta\Delta Cq}$  method. D1: donor 1, D2: donor 2, D3: donor 3

Table S1. Evolution of Shannon, Simpson and Piélou alpha diversity indexes in proximal and distal colons of the three systems. Results of the three donors are presented as mean  $\pm$  SD.

|     |         | Days            |                 |                 |                 |                 |                 |                 |                 |
|-----|---------|-----------------|-----------------|-----------------|-----------------|-----------------|-----------------|-----------------|-----------------|
|     |         | 14              | 21              | 25              | 28              | 35              | 42              | 49              | 53              |
| PC1 | Shannon | 1.26 $\pm$ 0.08 | 1.39 $\pm$ 0.14 | 1.21 $\pm$ 0.26 | 1.18 $\pm$ 0.31 | 1.41 $\pm$ 0.02 | 1.36 $\pm$ 0.04 | 1.41 $\pm$ 0.17 | 1.54 $\pm$ 0.2  |
|     | Simpson | 0.55 $\pm$ 0.08 | 0.62 $\pm$ 0.14 | 0.54 $\pm$ 0.18 | 0.55 $\pm$ 0.22 | 0.62 $\pm$ 0.07 | 0.58 $\pm$ 0.06 | 0.6 $\pm$ 0.12  | 0.63 $\pm$ 0.03 |
|     | Piélou  | 0.44 $\pm$ 0.08 | 0.5 $\pm$ 0.13  | 0.43 $\pm$ 0.14 | 0.42 $\pm$ 0.15 | 0.48 $\pm$ 0.09 | 0.49 $\pm$ 0.05 | 0.48 $\pm$ 0.1  | 0.52 $\pm$ 0.02 |
| PC2 | Shannon | 1.37 $\pm$ 0.38 | 1.39 $\pm$ 0.02 | 1.49 $\pm$ 0.27 | 1.47 $\pm$ 0.26 | 1.6 $\pm$ 0.12  | 1.67 $\pm$ 0.23 | 1.85 $\pm$ 0.2  | 1.84 $\pm$ 0.21 |
|     | Simpson | 0.61 $\pm$ 0.11 | 0.63 $\pm$ 0.07 | 0.66 $\pm$ 0.11 | 0.65 $\pm$ 0.12 | 0.72 $\pm$ 0.04 | 0.73 $\pm$ 0.06 | 0.78 $\pm$ 0.02 | 0.79 $\pm$ 0.02 |
|     | Piélou  | 0.47 $\pm$ 0.1  | 0.5 $\pm$ 0.1   | 0.53 $\pm$ 0.11 | 0.5 $\pm$ 0.09  | 0.57 $\pm$ 0.05 | 0.55 $\pm$ 0.05 | 0.62 $\pm$ 0.02 | 0.61 $\pm$ 0.02 |
| PC3 | Shannon | 1.21 $\pm$ 0.19 | 1.61 $\pm$ 0.22 | 1.55 $\pm$ 0.06 | 1.43 $\pm$ 0.16 | 1.44 $\pm$ 0.32 | 1.34 $\pm$ 0.42 | 1.63 $\pm$ 0.41 | 1.64 $\pm$ 0.32 |
|     | Simpson | 0.53 $\pm$ 0.14 | 0.7 $\pm$ 0.03  | 0.71 $\pm$ 0.04 | 0.66 $\pm$ 0.1  | 0.66 $\pm$ 0.13 | 0.6 $\pm$ 0.21  | 0.72 $\pm$ 0.12 | 0.72 $\pm$ 0.12 |
|     | Piélou  | 0.45 $\pm$ 0.15 | 0.54 $\pm$ 0.05 | 0.54 $\pm$ 0.08 | 0.5 $\pm$ 0.15  | 0.51 $\pm$ 0.14 | 0.46 $\pm$ 0.17 | 0.55 $\pm$ 0.13 | 0.55 $\pm$ 0.13 |
| DC1 | Shannon | 2.29 $\pm$ 0.77 | 2.37 $\pm$ 0.55 | 2.32 $\pm$ 0.7  | 2.44 $\pm$ 0.64 | 2.46 $\pm$ 0.41 | 2.43 $\pm$ 0.68 | 2.18 $\pm$ 0.82 | 2.09 $\pm$ 1.03 |
|     | Simpson | 0.76 $\pm$ 0.17 | 0.79 $\pm$ 0.12 | 0.78 $\pm$ 0.18 | 0.84 $\pm$ 0.09 | 0.84 $\pm$ 0.04 | 0.82 $\pm$ 0.11 | 0.74 $\pm$ 0.19 | 0.7 $\pm$ 0.28  |
|     | Piélou  | 0.61 $\pm$ 0.11 | 0.63 $\pm$ 0.1  | 0.61 $\pm$ 0.14 | 0.66 $\pm$ 0.09 | 0.66 $\pm$ 0.04 | 0.64 $\pm$ 0.08 | 0.57 $\pm$ 0.13 | 0.54 $\pm$ 0.2  |
| DC2 | Shannon | 2.29 $\pm$ 0.44 | 2.26 $\pm$ 0.35 | 2.32 $\pm$ 0.22 | 2.4 $\pm$ 0.22  | 2.53 $\pm$ 0.39 | 2.52 $\pm$ 0.47 | 2.11 $\pm$ 0.57 | 1.92 $\pm$ 0.55 |
|     | Simpson | 0.81 $\pm$ 0.06 | 0.8 $\pm$ 0.1   | 0.82 $\pm$ 0.06 | 0.85 $\pm$ 0.03 | 0.87 $\pm$ 0.03 | 0.85 $\pm$ 0.06 | 0.76 $\pm$ 0.14 | 0.68 $\pm$ 0.17 |
|     | Piélou  | 0.62 $\pm$ 0.08 | 0.62 $\pm$ 0.13 | 0.62 $\pm$ 0.07 | 0.64 $\pm$ 0.07 | 0.67 $\pm$ 0.03 | 0.66 $\pm$ 0.04 | 0.6 $\pm$ 0.1   | 0.52 $\pm$ 0.14 |
| DC3 | Shannon | 2.47 $\pm$ 0.59 | 2.42 $\pm$ 0.28 | 2.43 $\pm$ 0.16 | 2.46 $\pm$ 0.29 | 2.48 $\pm$ 0.28 | 2.43 $\pm$ 0.6  | 2.37 $\pm$ 0.56 | 2.19 $\pm$ 0.47 |
|     | Simpson | 0.82 $\pm$ 0.1  | 0.83 $\pm$ 0.04 | 0.84 $\pm$ 0.01 | 0.84 $\pm$ 0.03 | 0.85 $\pm$ 0.03 | 0.83 $\pm$ 0.11 | 0.81 $\pm$ 0.08 | 0.77 $\pm$ 0.09 |
|     | Piélou  | 0.66 $\pm$ 0.07 | 0.65 $\pm$ 0.02 | 0.66 $\pm$ 0.05 | 0.66 $\pm$ 0.06 | 0.67 $\pm$ 0.05 | 0.65 $\pm$ 0.11 | 0.63 $\pm$ 0.08 | 0.59 $\pm$ 0.06 |

PC: proximal colon, DC: distal colon, 1: system 1, 2: system 2, 3: system 3

## *Bacillota*

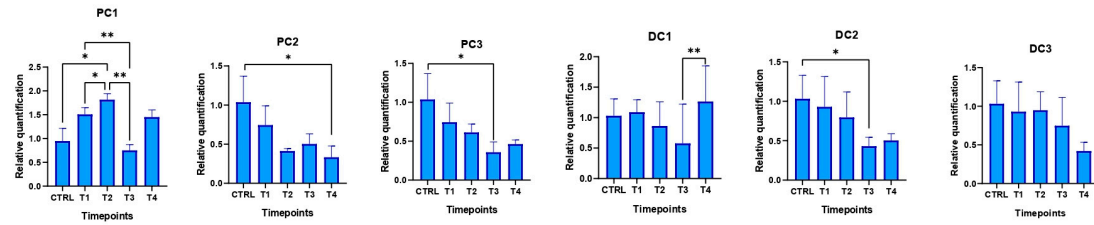

## *Bacteroidota*

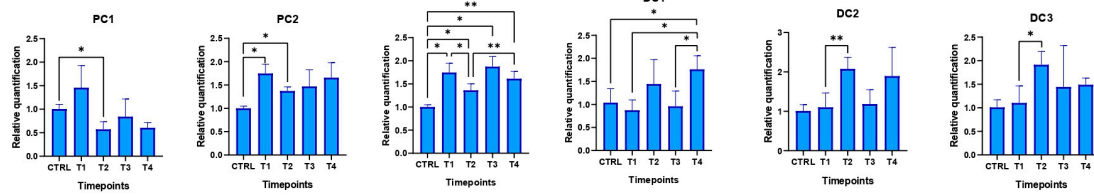

## *Gammaproteobacteria*

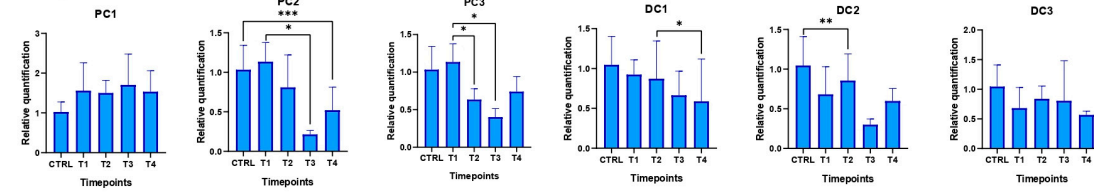

## *Actinomycetes*

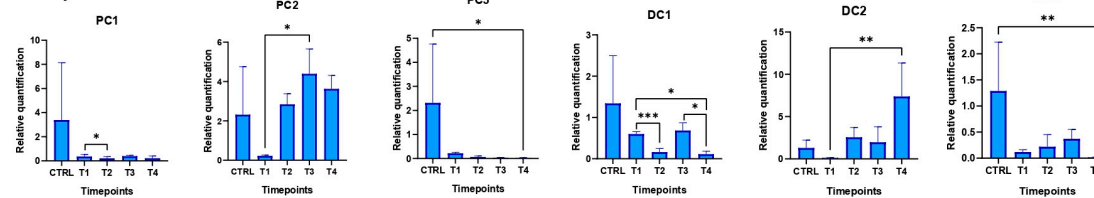

## *Escherichia coli/Shigella*

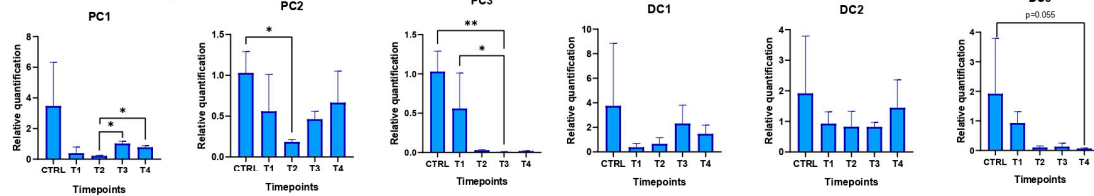

## *Akkermansia*

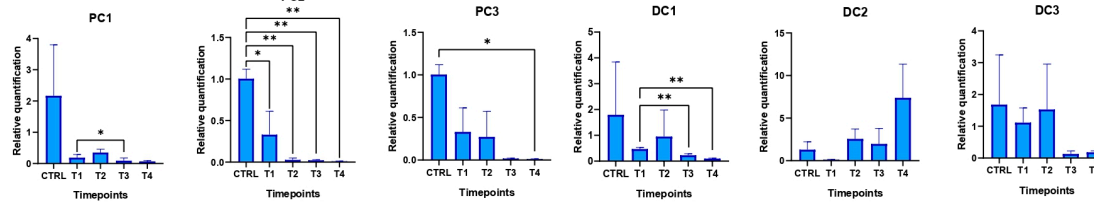

Figure S5 : Relative quantification of taxa assessed by qPCR from donor 1. Data presented were calculated using  $2^{-\Delta\Delta C_q}$  method. PC: proximal colon, DC: distal colon, 1: system 1, 2: system 2, 3: system 3. Statistical significance is indicated as p < 0.05 (\*), p < 0.01 (\*\*).

Table S2. Summary of qPCR p-values from donor 1

| Target                           | Bioreactor | Timepoints | p-value |
|----------------------------------|------------|------------|---------|
| <i>Bacillota</i>                 | PC1        | CTRL-T2    | 0.0455  |
| <i>Bacillota</i>                 | PC1        | T1-T2      | 0.0359  |
| <i>Bacillota</i>                 | PC1        | T2-T3      | 0.0021  |
| <i>Bacillota</i>                 | PC1        | T1-T3      | 0.0022  |
| <i>Bacillota</i>                 | DC1        | T3-T4      | 0.0092  |
| <i>Bacillota</i>                 | PC2        | CTRL-T4    | 0.0365  |
| <i>Bacillota</i>                 | PC3        | CTRL-T3    | 0.0175  |
| <i>Bacillota</i>                 | DC2        | CTRL-T3    | 0.0175  |
| <i>Bacteroidota</i>              | PC1        | CTRL-T2    | 0.0373  |
| <i>Bacteroidota</i>              | PC2        | CTRL-T1    | 0.0140  |
| <i>Bacteroidota</i>              | PC2        | CTRL-T2    | 0.0145  |
| <i>Bacteroidota</i>              | PC3        | CTRL-T1    | 0.014   |
| <i>Bacteroidota</i>              | PC3        | CTRL-T2    | 0.0248  |
| <i>Bacteroidota</i>              | PC3        | CTRL-T3    | 0.0154  |
| <i>Bacteroidota</i>              | PC3        | CTRL-T4    | 0.0096  |
| <i>Bacteroidota</i>              | PC3        | T1-T2      | 0.0457  |
| <i>Bacteroidota</i>              | PC3        | T2-T4      | 0.0088  |
| <i>Bacteroidota</i>              | DC1        | CTRL-T4    | 0.0137  |
| <i>Bacteroidota</i>              | DC1        | T1-T4      | 0.0107  |
| <i>Bacteroidota</i>              | DC1        | T3-T4      | 0.0143  |
| <i>Bacteroidota</i>              | DC2        | T1-T2      | 0.0014  |
| <i>Bacteroidota</i>              | DC3        | T1-T2      | 0.0450  |
| <i>Gammaproteobacteria</i>       | PC2        | CTRL-T4    | 0.0003  |
| <i>Gammaproteobacteria</i>       | PC2        | T1-T3      | 0.0306  |
| <i>Gammaproteobacteria</i>       | PC3        | T1-T2      | 0.0325  |
| <i>Gammaproteobacteria</i>       | PC3        | T1-T3      | 0.0123  |
| <i>Gammaproteobacteria</i>       | DC1        | T2-T4      | 0.0284  |
| <i>Gammaproteobacteria</i>       | DC2        | CTRL-T2    | 0.0073  |
| <i>Actinomycetes</i>             | PC1        | T1-T2      | 0.0148  |
| <i>Actinomycetes</i>             | PC2        | T1-T3      | 0.0175  |
| <i>Actinomycetes</i>             | PC3        | CTRL-T4    | 0.0365  |
| <i>Actinomycetes</i>             | DC1        | T1-T2      | 0.0005  |
| <i>Actinomycetes</i>             | DC1        | T1-T4      | 0.0197  |
| <i>Actinomycetes</i>             | DC1        | T3-T4      | 0.0136  |
| <i>Actinomycetes</i>             | DC2        | T1-T4      | 0.0035  |
| <i>Actinomycetes</i>             | DC3        | CTRL-T4    | 0.0175  |
| <i>Escherichia coli/Shigella</i> | PC1        | T2-T3      | 0.0115  |
| <i>Escherichia coli/Shigella</i> | PC1        | T2-T4      | 0.0134  |
| <i>Escherichia coli/Shigella</i> | PC2        | CTRL-T2    | 0.0175  |
| <i>Escherichia coli/Shigella</i> | PC3        | CTRL-T3    | 0.008   |
| <i>Escherichia coli/Shigella</i> | PC3        | T1-T3      | 0.0365  |
| <i>Escherichia coli/Shigella</i> | DC3        | CTRL-T4    | 0.055   |
| <i>Akkermansia</i>               | PC1        | T1-T3      | 0.0223  |
| <i>Akkermansia</i>               | PC2        | CTRL-T1    | 0.0322  |
| <i>Akkermansia</i>               | PC2        | CTRL-T2    | 0.0014  |
| <i>Akkermansia</i>               | PC2        | CTRL-T3    | 0.0016  |
| <i>Akkermansia</i>               | PC2        | CTRL-T4    | 0.0017  |
| <i>Akkermansia</i>               | PC3        | CTRL-T4    | 0.0175  |
| <i>Akkermansia</i>               | DC1        | T1-T3      | 0.0063  |
| <i>Akkermansia</i>               | DC1        | T1-T4      | 0.0035  |

PC: proximal colon, DC: distal colon, 1: system 1, 2: system 2, 3: system 3.

## *Bacillota*

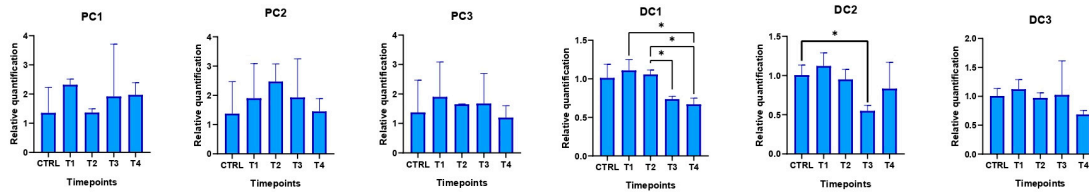

## *Bacteroidota*

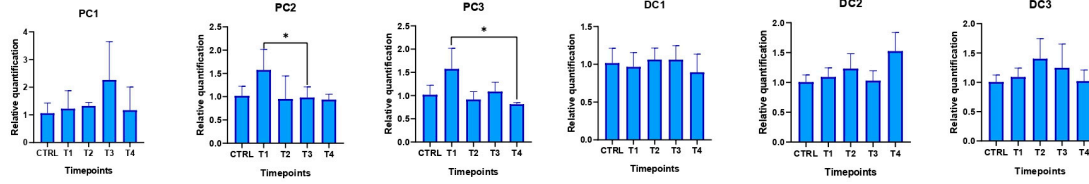

## *Gammaproteobacteria*

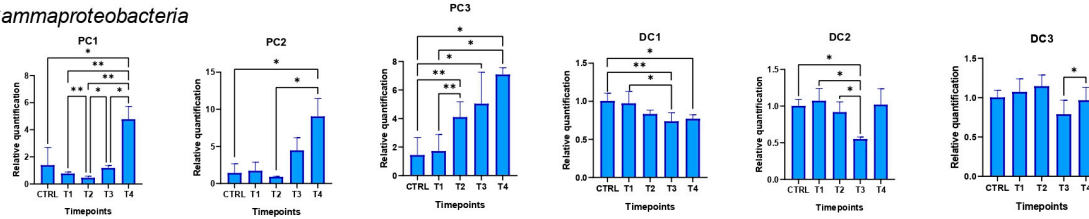

## *Actinomycetes*

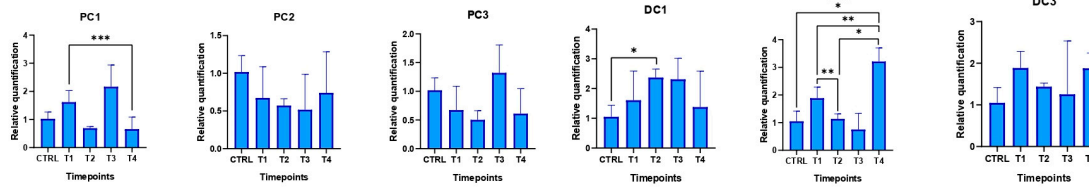

## *Escherichia coli/Shigella*

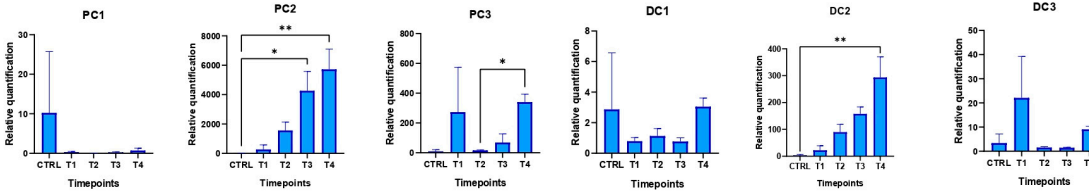

## *Akkermansia*

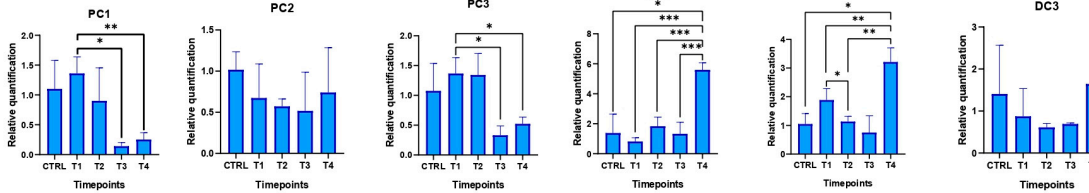

Figure S6 : Relative quantification of taxa assessed by qPCR from donor 2. Data presented were calculated using  $2^{-\Delta\Delta C_q}$  method. PC: proximal colon, DC: distal colon, 1: system 1, 2: system 2, 3: system 3. Statistical significance is indicated as  $p < 0.05$  (\*),  $p < 0.01$  (\*\*),  $p < 0.001$  (\*\*\*).

Table S3. Summary of qPCR p-values from donor 2

| Target                           | Bioreactor | Timepoints | p-value |
|----------------------------------|------------|------------|---------|
| <i>Bacillota</i>                 | PC1        | T1-T2      | 0.0232  |
| <i>Bacillota</i>                 | DC1        | T1-T4      | 0.0421  |
| <i>Bacillota</i>                 | DC1        | T2-T3      | 0.016   |
| <i>Bacillota</i>                 | DC1        | T2-T4      | 0.0289  |
| <i>Bacillota</i>                 | DC2        | CTRL-T3    | 0.0413  |
| <i>Bacillota</i>                 | DC3        | CTRL-T4    | 0.0232  |
| <i>Bacillota</i>                 | DC3        | T1-T4      | 0.0320  |
| <i>Bacteroidota</i>              | PC2        | T1-T3      | 0.0492  |
| <i>Bacteroidota</i>              | PC3        | T1-T4      | 0.0365  |
| <i>Gammaproteobacteria</i>       | PC1        | CTRL-T4    | 0.0489  |
| <i>Gammaproteobacteria</i>       | PC1        | T1-T2      | 0.0087  |
| <i>Gammaproteobacteria</i>       | PC1        | T1-T4      | 0.0094  |
| <i>Gammaproteobacteria</i>       | PC1        | T2-T3      | 0.0409  |
| <i>Gammaproteobacteria</i>       | PC1        | T2-T4      | 0.0086  |
| <i>Gammaproteobacteria</i>       | PC1        | T3-T4      | 0.0203  |
| <i>Gammaproteobacteria</i>       | PC2        | CTRL-T4    | 0.0175  |
| <i>Gammaproteobacteria</i>       | PC2        | T2-T4      | 0.0365  |
| <i>Gammaproteobacteria</i>       | PC3        | CTRL-T2    | 0.0044  |
| <i>Gammaproteobacteria</i>       | PC3        | CTRL-T3    | 0.0395  |
| <i>Gammaproteobacteria</i>       | PC3        | CTRL-T4    | 0.0256  |
| <i>Gammaproteobacteria</i>       | PC3        | T1-T2      | 0.0017  |
| <i>Gammaproteobacteria</i>       | PC3        | T1-T4      | 0.0268  |
| <i>Gammaproteobacteria</i>       | DC1        | CTRL-T3    | 0.0033  |
| <i>Gammaproteobacteria</i>       | DC1        | CTRL-T4    | 0.0315  |
| <i>Gammaproteobacteria</i>       | DC1        | T1-T3      | 0.0283  |
| <i>Gammaproteobacteria</i>       | DC2        | CTRL-T3    | 0.0135  |
| <i>Gammaproteobacteria</i>       | DC2        | T1-T3      | 0.0359  |
| <i>Gammaproteobacteria</i>       | DC2        | T2-T3      | 0.0322  |
| <i>Gammaproteobacteria</i>       | DC3        | T3-T4      | 0.0110  |
| <i>Actinomycetes</i>             | PC1        | T1-T4      | <0.0001 |
| <i>Actinomycetes</i>             | DC1        | CTRL-T2    | 0.0260  |
| <i>Actinomycetes</i>             | DC2        | CTRL-T4    | 0.0465  |
| <i>Actinomycetes</i>             | DC2        | T1-T2      | 0.0337  |
| <i>Actinomycetes</i>             | DC2        | T1-T4      | 0.0035  |
| <i>Actinomycetes</i>             | DC2        | T2-T4      | 0.0044  |
| <i>Escherichia coli/Shigella</i> | PC2        | CTRL-T3    | 0.0365  |
| <i>Escherichia coli/Shigella</i> | PC2        | CTRL-T4    | 0.008   |
| <i>Escherichia coli/Shigella</i> | PC3        | T2-T4      | 0.0365  |
| <i>Escherichia coli/Shigella</i> | DC1        | T1-T4      | 0.0070  |
| <i>Escherichia coli/Shigella</i> | DC1        | T3-T4      | 0.0250  |
| <i>Escherichia coli/Shigella</i> | DC2        | CTRL-T4    | 0.0035  |
| <i>Akkermansia</i>               | PC1        | T1-T3      | 0.0214  |
| <i>Akkermansia</i>               | PC1        | T1-T4      | 0.0041  |
| <i>Akkermansia</i>               | PC3        | T1-T3      | 0.0294  |
| <i>Akkermansia</i>               | PC3        | T1-T4      | 0.0094  |
| <i>Akkermansia</i>               | DC1        | CTRL-T4    | 0.0123  |
| <i>Akkermansia</i>               | DC1        | T1-T4      | 0.0003  |
| <i>Akkermansia</i>               | DC1        | T2-T4      | 0.0003  |
| <i>Akkermansia</i>               | DC1        | T3-T4      | 0.0005  |
| <i>Akkermansia</i>               | DC2        | CTRL-T4    | 0.0465  |
| <i>Akkermansia</i>               | DC2        | T1-T2      | 0.0337  |
| <i>Akkermansia</i>               | DC2        | T1-T4      | 0.0035  |
| <i>Akkermansia</i>               | DC2        | T2-T4      | 0.0044  |

PC: proximal colon, DC: distal colon, 1: system 1, 2: system 2, 3: system 3.

## Bacillota

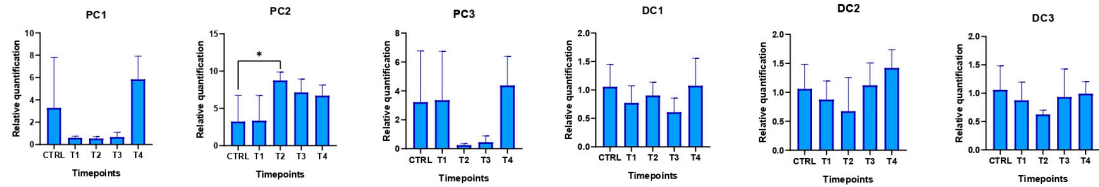

## Bacteroidota

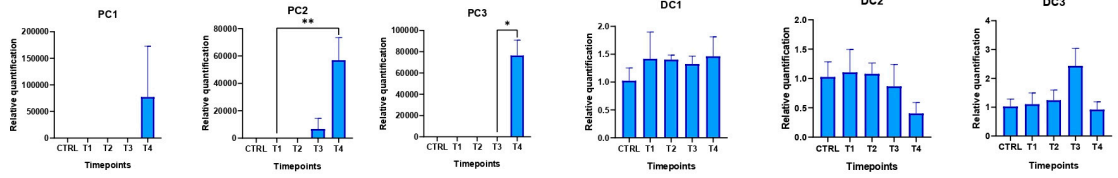

## Gammaproteobacteria

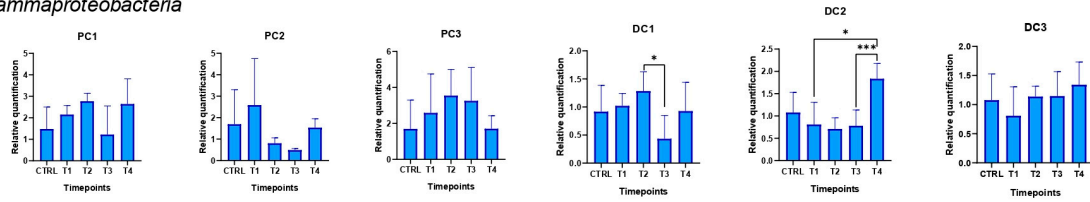

## Actinomycetes

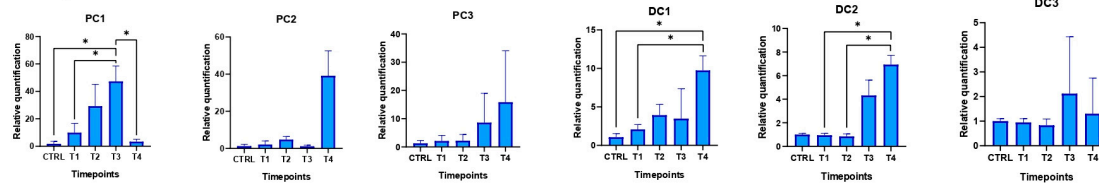

## Escherichia coli/Shigella

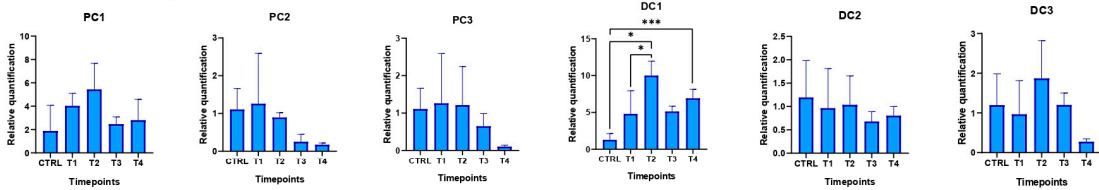

## Akkermansia

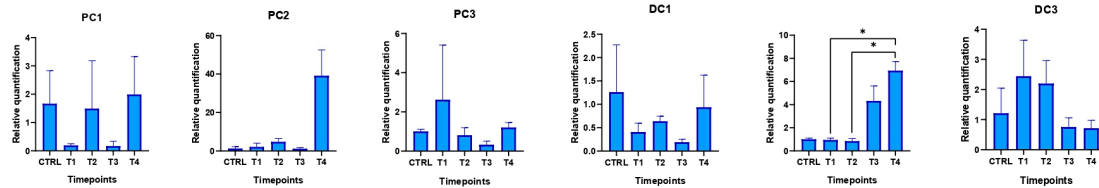

Figure S7 : Relative quantification of taxa assessed by qPCR from donor 3. Data presented were calculated using  $2^{-\Delta\Delta C_q}$  method. PC: proximal colon, DC: distal colon, 1: system 1, 2: system 2, 3: system 3. Statistical significance is indicated as  $p < 0.05$  (\*),  $p < 0.01$  (\*\*),  $p < 0.001$  (\*\*\*).



Table S4: Summary of qPCR p-values from donor 3

| Target                           | Bioreactor | Timepoints | p-value |
|----------------------------------|------------|------------|---------|
| <i>Bacillota</i>                 | PC1        | T1-T4      | 0.0499  |
| <i>Bacillota</i>                 | PC2        | CTRL-T2    | 0.017   |
| <i>Bacteroidota</i>              | PC2        | T1-T4      | 0.008   |
| <i>Bacteroidota</i>              | PC3        | T3-T4      | 0.0175  |
| <i>Gammaproteobacteria</i>       | PC1        | CTRL-T4    | 0.0365  |
| <i>Gammaproteobacteria</i>       | DC1        | T2-T3      | 0.0187  |
| <i>Gammaproteobacteria</i>       | DC2        | T1-T4      | 0.0137  |
| <i>Gammaproteobacteria</i>       | DC2        | T3-T4      | 0.001   |
| <i>Actinomycetes</i>             | PC1        | CTRL-T3    | 0.0145  |
| <i>Actinomycetes</i>             | PC1        | T1-T3      | 0.0264  |
| <i>Actinomycetes</i>             | PC1        | T3-T4      | 0.0207  |
| <i>Actinomycetes</i>             | DC1        | CTRL-T4    | 0.0107  |
| <i>Actinomycetes</i>             | DC1        | T1-T4      | 0.018   |
| <i>Actinomycetes</i>             | DC2        | T1-T4      | 0.0365  |
| <i>Actinomycetes</i>             | DC2        | T2-T4      | 0.0365  |
| <i>Escherichia coli/Shigella</i> | DC1        | CTRL-T2    | 0.0224  |
| <i>Escherichia coli/Shigella</i> | DC1        | CTRL-T4    | 0.0004  |
| <i>Escherichia coli/Shigella</i> | DC1        | T1-T2      | 0.0466  |
| <i>Akkermansia</i>               | DC1        | T2-T3      | 0.0059  |
| <i>Akkermansia</i>               | DC2        | T1-T4      | 0.0365  |
| <i>Akkermansia</i>               | DC2        | T2-T4      | 0.0365  |

PC: proximal colon, DC: distal colon, 1: system 1, 2: system 2, 3: system 3.
